# Supplementary material
Source: bioRxiv or medRxiv preprint supplement (https://www.biorxiv.org/content/biorxiv/early/2023/02/01/2023.01.30.525828.1/DC1/embed/media-1.pdf)
Supplement: Supplementary file [file media-1.pdf]

## Supplementary Information

### **A versatile synaptotagmin-1 nanobody provides perturbation-free live synaptic imaging and low linkage-error in super-resolution microscopy**

Karine Queiroz Zetune Villa Real<sup>1,2,8</sup>, Nikolaos Mougios<sup>1,2,8</sup>, Ronja Rehm<sup>1,8</sup>, Shama Sograte-Idrissi<sup>1,2,8</sup>, László Albert<sup>1,2</sup>, Amir Mohammad Rahimi<sup>1,2</sup>, Manuel Maidorn<sup>1,2</sup>, Jannik Hentze<sup>1,2</sup>, Markel Martínez-Carranza<sup>3</sup>, Hassan Hosseini<sup>4</sup>, Kim Saal<sup>1</sup>, Nazar Oleksiievets<sup>5</sup>, Matthias Prigge<sup>4,6</sup>, Roman Tsukanov<sup>5</sup>, Pål Stenmark<sup>3,9</sup>, Eugenio F. Fornasiero<sup>1,9</sup>, Felipe Opazo<sup>1,2,7,9,10</sup>

<sup>1</sup>Institute of Neuro- and Sensory Physiology, University Medical Center Göttingen, 37073 Göttingen, Germany.

<sup>2</sup>Center for Biostructural Imaging of Neurodegeneration (BIN), University Medical Center Göttingen, 37075 Göttingen, Germany.

<sup>3</sup>Department of Biochemistry and Biophysics, Stockholm University, SE-10691 Stockholm, Stockholm, Sweden.

<sup>4</sup>Research Group Neuromodulatory Networks, Leibniz Institute for Neurobiology, 39118 Magdeburg, Germany

<sup>5</sup>III. Institute of Physics - Biophysics, Georg August University, 37077 Göttingen, Germany.

<sup>6</sup>Center for Behavioral Brain Sciences, 39118 Magdeburg, Germany.

<sup>7</sup>NanoTag Biotechnologies GmbH, Rudolf-Wissell-Straße 28a, 37079 Göttingen.

<sup>8</sup>These Authors contributed equally to this work

<sup>9</sup>Corresponding Authors: [fopazo@gwdg.de](mailto:fopazo@gwdg.de); [efornas@gwdg.de](mailto:efornas@gwdg.de), [stenmark@dbb.su.se](mailto:stenmark@dbb.su.se)

<sup>10</sup>This Author supervised the work

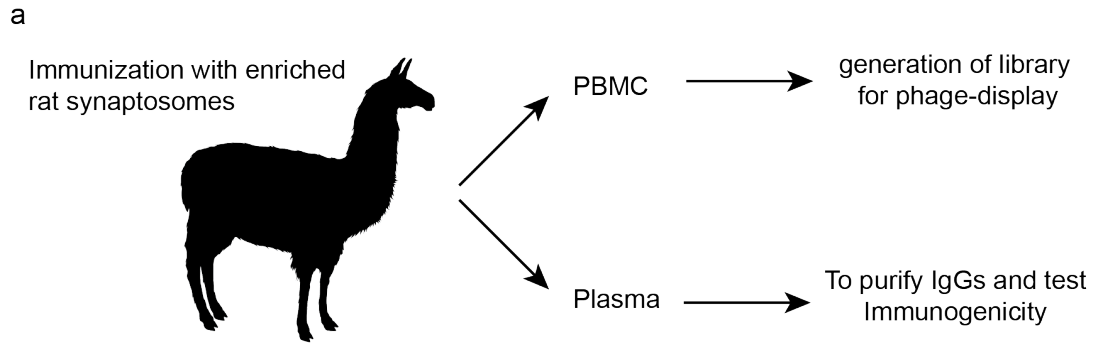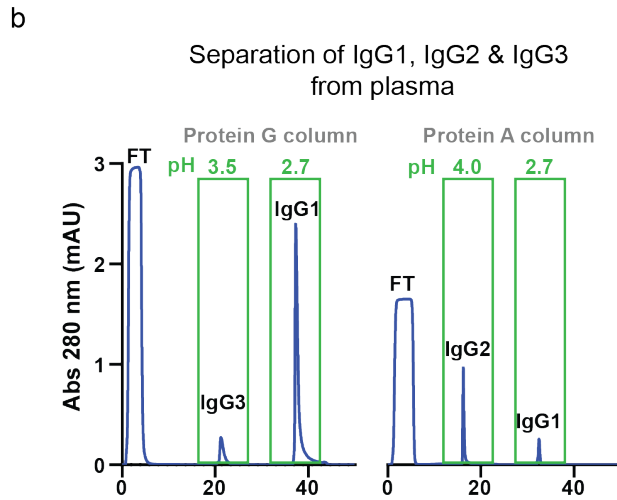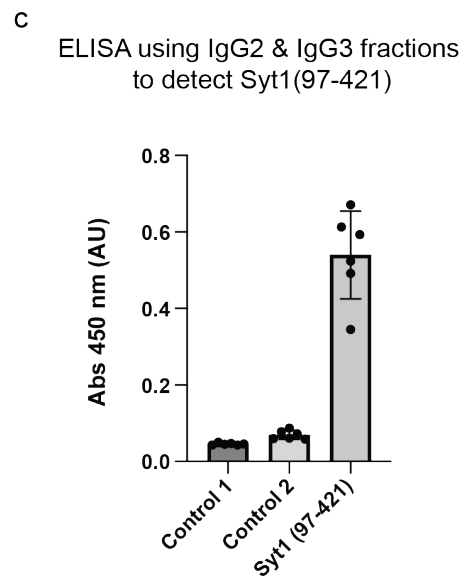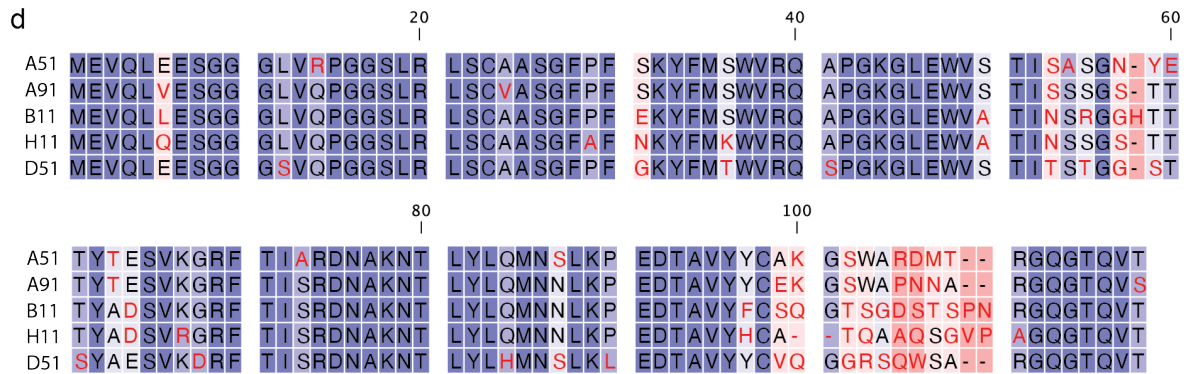

1  
2 **Supplementary Figure 1.** Overview of immunization and discovery strategy. (a) Immunization was  
3 performed using synaptosomes enriched from rat central nervous system. After immunization  
4 campaign, peripheral blood lymphocytes (PBMCs) and plasma were separated from 100 ml of blood.  
5 PBMCs were further use to generate the nanobody library, while plasma was further process to separate  
6 the different antibodies isotypes. (b) Example of the chromatographic procedure to enrich for IgG2 and  
7 IgG3 from plasma using a combination of Protein G and Protein A columns with elutions at different  
8 pH (FT: flow through of material not bound to column). (c) rSyt-1<sub>(97-421)</sub> was immobilized on an ELISA  
9 plate and revealed using enriched IgG2 and IgG3 as obtained in (b). Negative control 1 correspond to  
10 wells without rSyt1 immobilized and control 2 are wells without IgG2/3. For both controls we use the  
11 same amount and times of the detection system (anti alpaca antibody conjugated to Horse radish  
12 peroxidase, followed by Turbo TMB substrate). (d) Sequences of the 5 clones showing the higher signal  
13 in ELISA when rSyt-1 was immobilized.

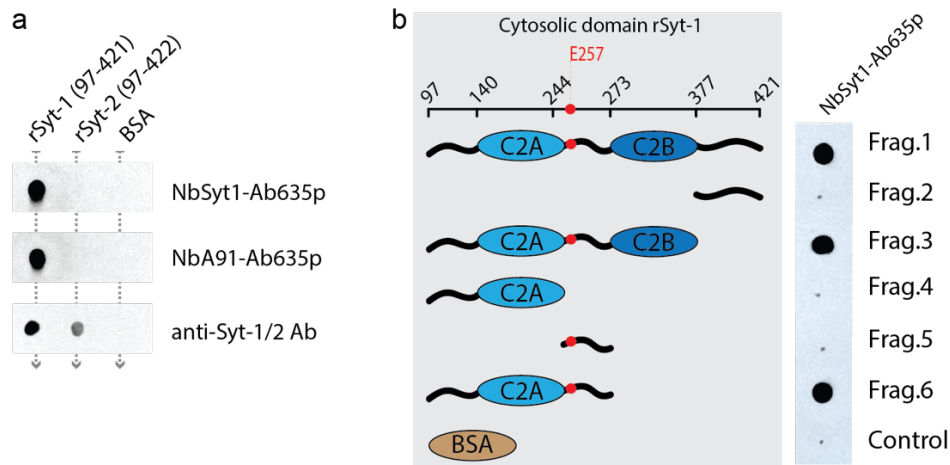

1  
2 **Supplementary Figure 2.** Specific for Syt-1, epitope mapping. (a) Equivalent amounts of purified rat  
3 Syt-1<sub>(97-421)</sub> and rat Syt-2<sub>(97-422)</sub> were spotted on nitrocellulose membranes, as control 5 µg of bovine  
4 serum albumin (BSA) was also spotted on the membrane. After blocking, equivalent membranes were  
5 incubated with nanobodies directly labeled with AbberiorStar635p (NbSyt1-Ab635p, NbA91-Ab635p)  
6 or using conventional primary, wash secondary antibody (rabbit polyclonal primary recognizing both  
7 Syt1/2 (SySy, Cat# 105 003), revealed by secondary antibodies conjugated with AbberiorStar635p). (b)  
8 different truncated fragment from the cytoplasmic domain of rat Synaptotagmin 1 (rSyt-1) were spotted  
9 in equivalent amount on a nitrocellulose membrane, together with BSA as control (Fragment 1 (Frag.1):  
10 97-421; Frag.2: 377-421; Frag.3: 97-377; Frag.4: 97-244; Frag.5: 244-273; Frag.6: 97-273). NbSyt1-  
11 Ab635p was used to reveal the recognized fragments.

12  
13  
14  
15  
16  
17  
18  
19  
20  
21  
22  
23  
24  
25  
26  
27  
28  
29  
30  
31  
32  
33  
34  
35  
36

1 **Supp. Table 1.** Data collection and refinement statistics.

---

| <b>Data collection</b>             |                     |
|------------------------------------|---------------------|
| Space group                        | P 21 21 21          |
| Cell dimensions                    |                     |
| <i>a</i> , <i>b</i> , <i>c</i> (Å) | 52.41, 65.75, 66.91 |
| $\alpha$ , $\beta$ , $\gamma$ (°)  | 90.0, 90.0, 90.0    |
| Resolution (Å)                     | 1.68                |
| Rsym or Rmerge                     | 0.087 (3.822)       |
| <i>I</i> / $\sigma$ <i>I</i>       | 11.85 (0.66)        |
| Completeness (%)                   | 97.8 (96.1)         |
| Multiplicity                       | 8.9 (9.2)           |

---

| <b>Refinement</b>                    |              |
|--------------------------------------|--------------|
| Resolution (Å)                       | 1.68         |
| No. reflections                      | 26393 (1246) |
| R <sub>work</sub> /R <sub>free</sub> | 0.19/0.23    |

---

|                  |      |
|------------------|------|
| <b>No. atoms</b> | 2051 |
| Protein          | 1967 |
| Ligand/ion       | 37   |
| Water            | 47   |

---

|                  |       |
|------------------|-------|
| <b>B-factors</b> | 37.69 |
| Protein          | 37.44 |
| Ligand/ion       | 49.76 |
| Water            | 38.64 |

---

| <b>R.m.s. deviations</b> |       |
|--------------------------|-------|
| Bond lengths (Å)         | 0.006 |
| Bond angles (°)          | 0.89  |

---

2

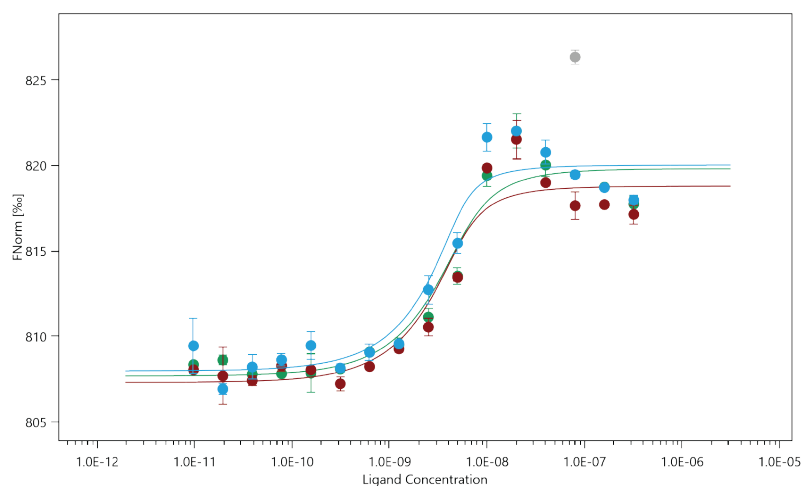

### Dataset Overview

| Name:                     | First Sample         | Second Sample        | Third Sample         |
|---------------------------|----------------------|----------------------|----------------------|
| Graph Color:              | ●                    | ●                    | ●                    |
| Target Name:              | Nb A51               | Nb A51               | Nb A51               |
| Target Concentration:     | 5 nM                 | 5 nM                 | 5 nM                 |
| Ligand Name:              | Synaptotagmin1       | Synaptotagmin1       | Synaptotagmin1       |
| Ligand Concentration:     | 320 nM to 0.00977 nM | 320 nM to 0.00977 nM | 320 nM to 0.00977 nM |
| n:                        | 2                    | 2                    | 2                    |
| Comments:                 |                      |                      |                      |
| Excitation Power:         | 5%                   | 5%                   | 5%                   |
| MST Power:                | 60%                  | 60%                  | 60%                  |
| Temperature:              | 22.0°C               | 22.3°C               | 21.9°C               |
| <b>Kd:</b>                | <b>1.0883E-09</b>    | <b>7.0506E-10</b>    | <b>4.1627E-10</b>    |
| Kd Confidence:            | ± 7.7984E-10         | ± 6.5832E-10         | ± 4.6011E-10         |
| Response Amplitude:       | 12.115881            | 11.476413            | 12.027773            |
| TargetConc:               | 5E-09[Fixed]         | 5E-09[Fixed]         | 5E-09[Fixed]         |
| Unbound:                  | 807.69               | 807.31               | 807.98               |
| Bound:                    | 819.81               | 818.79               | 820.01               |
| Std. Error of Regression: | 1.3749205            | 1.4772043            | 1.4553421            |
| Reduced $\chi^2$ :        | 24.55617             | 171.57472            | 570.00506            |
| Signal to Noise:          | 9.5181117            | 8.3452543            | 8.8775696            |

**Supplementary Figure 3.** Affinity determination using microscale thermophoresis (nanoTemper). Three independent measurements of directly labeled NbSyt1-Alexa647 mixed at different concentrations with rSyt-1<sub>(97-421)</sub>.

1  
2  
3  
4  
5  
6  
7  
8  
9  
10

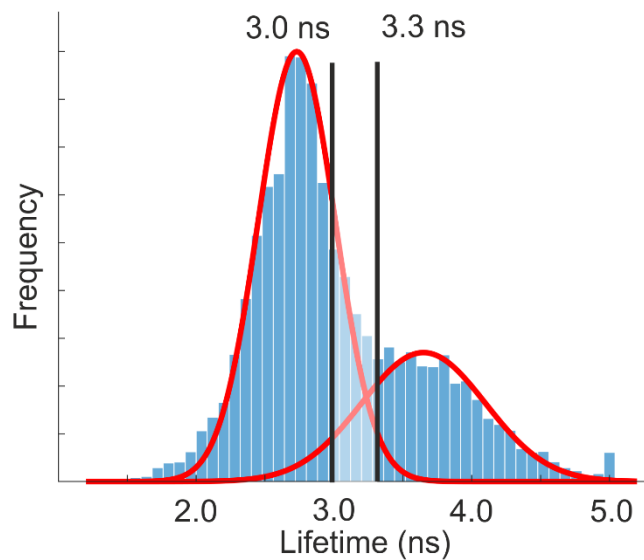

1  
2 **Supplementary Figure 4:** Target crosstalk evaluation in FL-PAINT. Lifetime histogram  
3 (blue), the fitted Gaussian function (red), and the selected lifetime threshold values (black lines)  
4 of image shown in Figure 3b. The crosstalk is calculated based on lifetime threshold values.  
5 To improve separation between the targets, localizations in-between two lifetime threshold  
6 values were excluded (the region between the peaks marked in light blue color). In this case  
7 the two-target total crosstalk is 3.8%.  
8  
9
